# Supplementary material for: JMJD3 facilitates C/EBPβ-centered transcriptional program to exert oncorepressor activity in AML
Source: PubMed Central journal article supplement (PMC6105679; doi:10.1038/s41467-018-05548-z), 2018-08-22
Supplement: 41467_2018_5548_MOESM2_ESM.pdf [file 41467_2018_5548_MOESM2_ESM.pdf]

## **Description of Additional Supplementary Files**

File Name: Supplementary Data 1

Description: Patients' information.

File Name: Supplementary Data 2

Description: Differential expression analyses of RNA-seq data between HL-60 cells transduced with control and JMJD3-expressing vector.

File Name: Supplementary Data 3

Description: Differential expression analyses of RNA-seq data between parental and *JMJD3* KO HL-60 cell lines.

File Name: Supplementary Data 4

Description: List of C/EBP $\beta$  target genes.

File Name: Supplementary Data 5

Description: Sequence of PCR primers.
